# Supplementary material for: SvABA: genome-wide detection of structural variants and indels by local assembly
Source: HighWire-hosted journal article supplement (doi:10.1101/gr.221028.117), 2018-03-13

Supplemental Figure 1

Filter and error-correct reads

Retrieve reads with mismatches to the reference

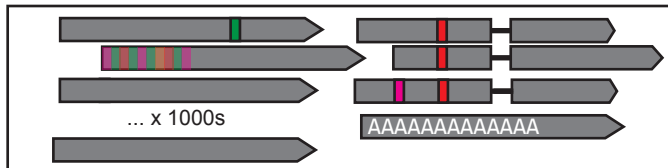

Remove coverage spikes and long repeats

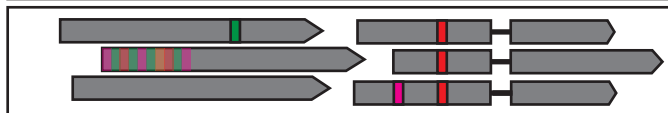

Trim low quality bases and adapters

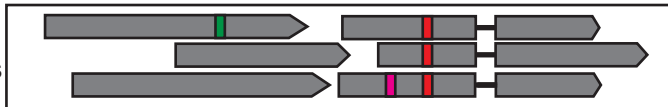

Error correction with BFC or SGA

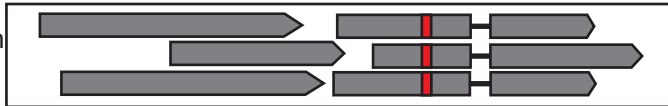

Supplement: Supplemental_Fig_S1.pdf [file Supplemental_Fig_S1.pdf]
