# Supplementary material for: SvABA: genome-wide detection of structural variants and indels by local assembly
Source: HighWire-hosted journal article supplement (doi:10.1101/gr.221028.117), 2018-03-13
Supplement: Supplemental_Methods.docx [file Supplemental_Methods.docx]

**­­­­Supplemental Methods**

**Supplemental Figures**

**Supplemental Figure 1**: Workflow for filtering and error-correcting sequence reads prior to assembly. Reads with a mismatch to the reference are subsampled at sites of unusually high coverage, and reads with long (> 40 bp) homopolymer repeats are excluded. Low-quality bases (scaled Phred score < 4) and sequencing adapters are removed. All of these sequences are then corrected using a either k-mer correction strategy described from SGA (Simpson and Durbin 2012) or a Bloom-filter based correction (default) from BFC (Li 2015).

**Supplemental Figure 2**: Strategy for extracting SV and indel variants from alignments of contigs to the reference. a) Example contig with both a gapped alignment (insertion variant) and a multi-part alignment (SV). b) All alignments of the contig are grouped into an AlignedContig object. A single AlignedContig object may contain multiple AlignedFragment objects, which represents alignments of some subsequence of the contig. A single AlignedFragment may have multiple alignment locations (alignments B, C and D) if the alignment is ambiguous and multiple high-scoring locations are possible. c) Indel variants are extracted from AlignedFragment objects by parsing the CIGAR string of the alignment. d) SVs are extracted from pair-wise combinations of AlignedFragment sequences, which each combination representing a separate possible SV. In the case that an AlignedFragment has one or more secondary alignments (shown here with one primary [alignment B] and two secondary [alignments C and D]), each possible combination is considered and reported in the unfiltered output.

**Supplemental Figure 3**: The relative frequencies (y-axis) of assembled contig lengths from SvABA on NA12878, sequenced with 151 base paired-end reads. Contigs that support indels (orange) and SVs (green) are significantly longer than non-variant supporting contigs (p < 10-16, Wilcoxon-test).

**Supplemental Figure 4**: Comparison of SvABA indel calls with indels from the dbSNP database. The overlap with dbSNP was highly size dependent, with large indels being under represented in dbSNP.

**­­­Supplemental Figure 5**: Size distribution of SvABA calls, subdivided by overlap with the GIAB and HySA indels. Both the absolute counts and the relative proportions among the callsets are shown for each size. Short indels are significantly more likely to overlap a GIAB call, while the longer indels exhibit an overlap rate with the HySA calls that is independent of indel size.

­­­

**Supplemental Figure 6**: Relative sensitivity and specificity for deletions and duplications/insertions in NA12878, compared with Genome-in-a-Bottle indel variants and HySA SV variants.

**Supplemental Figure 7**: Distribution of genotypes for indels and small (< 300 bp) SVs in an Ashkenazim trio. The distribution of genotypes (0/0: homozygous reference; 0/1; heterozygous; 1/1 homozygous variant) in the son (y-axis) for variants identified as heterozygous (0/1) in each parent. Mendelian inheritance would predict a theoretical distribution of 2:1:1.

**Supplemental Figure 8**: Simulated *in silico* tumor genome. a) Event sizes were drawn from an inverse power law distribution, with an additional spike-in of small (< 10 bp) indels. b) Histogram of the sizes of the simulated indels and rearrangements. The distribution follows the inverse power law for events > 10 bp, and shows enrichment for indels below 10 bp.

**Supplemental Figure 9**: Two example clusters of somatic rearrangements from HCC1143 with breakpoints separated by fewer than 1,000 bp. These clusters may represent contiguous chains of templated-sequence insertions, with insertion sequences derived from several different chromosomes. The full list of rearrangement clusters is provided in Supplemental Table 3.

**Supplemental Figure 10**: Validation by polymerase chain reaction of eight templated-sequence insertion rearrangements in HCC1143. TSI events, primers and sequencing products are provided in Supplemental Table 4. All eight TSI events validated in the HCC1143, with a PCR product from only the cancer cell line and no product in the paired-normal (HCC1143_BL).

**Supplemental Figure 11**: Complex amplification at the *EGFR* locus in a glioblastoma, mediated in part by templated-sequence insertion (TSI) rearrangements. a) SvABA detected rearrangements with both simple and TSI junctions that contributed to the amplicon. b) Partial view of an assembly contig supporting the purple TSI junction from (a). A majority of the junction-spanning reads were initially unaligned (red reads) and were rescued by the assembly and read-to-contig realignments. The sequence bases are scrambled to hide germline variants.

**Supplemental Figure 12:** Contribution of medium-sized SVs to disruption of known driver genes in cancer. **a)** Fold-enrichment (y-axis) for breakpoints from SVs and indels of three different size regimes (1-20 bp, 20-50 bp, 51-500 bp) occurring inside exons of known cancer genes versus from all exons. ­­**b**) A frameshift deletion of 62 bp in exon 34 of NOTCH2 in a breast adenocarcinoma (TCGA-AO-A0J6-01). The partial amino acid sequence of exon 34 is shown for reference. **c)** A likely loss-of-function 44 bp frameshift tandem duplication in exon 2 of *TP53* in a lung squamous cell carcinoma (TCGA-68-7755).

**Supplemental Tables**

**Supplemental Table 1**: Single contigs with multiple (3+) high-quality alignments and substantial tumor-only read support from SvABA in 101 base read data in HCC1143.

**Supplemental Table 2**: Clusters of somatic rearrangements from HCC1143, connected by separate rearrangements with breakpoints fewer than 1,000 bp apart.

**Supplemental Table 3**: Primers and validation status for SVs with putative templated-sequence insertion junctions.

**Supplemental Table 4**: Number of somatic templated-sequence insertion rearrangements and total somatic SVs from 344 TCGA whole-genome tumor-normal pairs.

**Supplemental Table 5**: Viral integration sites identified by SvABA in 16 head and neck squamous cell carcinoma whole-genome tumor-normal pairs. Integration sites were compared with the sites identified by Parfenov *et al* (Parfenov et al. 2014). The viral site is the coordinates of the breakpoint on the viral genome.

**Supplemental Methods**

*Down-sampling regions of high coverage*

To avoid computational bottlenecks associated with ultra-high coverage regions, extracted reads are subsampled to keep coverage below a user-specified level (default=100). SvABA also allows users to exclude pre-specified regions. A recommended exclusion interval file that masks centromeres and alpha satellite regions is provided for hg19 at <https://data.broadinstitute.org/svaba/svaba_exclusions.bed>. Targeted assemblies can be performed by providing a BED file or coordinate string (e.g. 1:1,000,000-2,000,000).

*Read trimming and error correction*

To reduce assembly errors from low-quality bases, reads are trimmed at their 3’ and 5’ ends prior to assembly. Starting from each end of the read, bases are removed until a high quality (scaled-base-quality score > 4) is identified. Reads trimmed to fewer than 30 bases are removed. Reads with a clipped alignment size and insert-size consistent with sequencing into the sequencing adapter are excluded.

SvABA wraps two error-correction strategies that can be toggled by the user at run-time: Bloom-filter correction BFC (Li 2015), and a *k*-mer tracking method as implemented in SGA(Simpson and Durbin 2012). BFC is the default error correction method because of its improved speed over the k-mer strategy implemented in SGA, and its ability to error-correct both gapped alignments and single nucleotide errors. For the *k*-mer method, SvABA uses a *k*-mer size of 31, and accepts *k*-mers with three or more instances as representing a true sequence. SvABA can optionally emit a FASTA file of error-corrected sequences. For both types of error correction, all of the reads from the assembly window, including non-variant reads, are used to train the error corrector.

*Sequence assembly with SGA*

SvABA performs sequence assembly using a custom version of the String Graph Assembly (SGA) pipeline (Simpson and Durbin 2012) that performs FM-indexing, string graph construction and graph traversal entirely in memory with no intermediate files. The SGA implementation in SvABA deviates from the default settings for whole-genome *de novo* assemblies to improve the sensitivity for building variant-spanning contigs. The default in SvABA is to require a minimum overlap of 60% of the read length when evaluating overlaps between reads, to not trim any terminal branches of the assembly graphs, and to exclude contigs with length less than 130% of the read length.

The command line version of SGA produces a text file (ASQG file) representation of the overlap graph, which can be used to visualize and debug assemblies. To allow for rapid debugging and visualization of the local assemblies, SvABA optionally emits the ASQG files for each local assembly window using the —write-asqg option. Because this will produce an ASQG file for each assembly window, the recommended use is to produce ASQG files only for debugging targeted assemblies.

*Contig realignment to the reference genome*

To improve the probability that a contig supporting a true variant will correctly align with a gapped or multi-part alignment, SvABA uses the following BWA-MEM options: gap-opening penalty of 32, gap extension penalty of 1, mismatch penalty of 18, match score of 2, Smith-Waterman bandwidth of 1000, reseed trigger of 1.5, and 3’ and 5’ clipping penalties of 5. The effect of these parameters is to allow for alignment with large gaps (as found in large indels and SVs), and to minimize excessive single nucleotide mismatches that could create false positive alignments. Regardless of whether the contig alignments support a candidate variant, the alignment records of all the contigs are emitted directly to a BAM file.

*Comparison of SV and indel calls*

To reduce confounding effects of differing conventions and detection strategies implemented by the various SV and indel detection tools, we allowed some difference between breakpoint locations for different callers when comparing overlaps between callsets. For short events, we considered two events as overlapping if their first breakpoints were within 30 bp of each other. For SVs larger than 50 bp, we allow up to 500 bp of difference between the variant sites, with the added requirement that both the left and right breakpoints of large SVs (> 300 bp) overlap between the callsets. Because the spacing between large SVs in the human genome is typically on the order of 10-100s of kb, the rate of spurious overlaps due to allowing a small amount of breakpoint ambiguity is insignificant. For all methods, calls from regions with very low sequence mappability were excluded using the regions defined in: <https://data.broadinstitute.org/svaba/svaba_exclusions.bed>.

*Genotyping in Ashkenazi trio*

BAM files for the Ashkenazi trio were downloaded from [ftp://ftp-trace.ncbi.nlm.nih.gov/giab/ftp/data/AshkenazimTrio](ftp://ftp-trace.ncbi.nlm.nih.gov/giab/ftp/data/AshkenazimTrio/HG002_NA24385_son/NIST_HiSeq_HG002_Homogeneity-10953946/NHGRI_Illumina300X_AJtrio_novoalign_bams/). SvABA was run jointly on all three genomes, with the son serving as the “tumor” genome and each parent as a matched “normal.” We calculated the ratio of homozygous to heterozygous variants in the son for all variants with quality score > 20 and scored as heterozygous in each parent.

*In silico tumor genome*

We generated an *in silico* tumor genome by creating rearranging the reference genome (hg19) and generating 2,000 bp contigs spanning the rearrangements. Our *in silico* tumor contained 49,995 heterozygous SVs and indels, including 2,741 duplications, 5,444 deletions, 21,334 large (> 2,000 bp) intra-chromosomal rearrangements, 9,037 small deletions (< 50 bp) and 8,918 small insertions. To model the novel junction insertions of NHEJ, we supplied half of the junctions with novel 1-20 bp insertions. Virtual reads were generated from the breakpoint contig FASTA files using the ART read simulator (Huang et al. 2012) and the standard Illumina error profile. We simulated 101 base pair read pairs at 10x coverage across the breakpoint contigs. To simulate a heterozygous, impure tumor genome, we combined the simulated reads with real sequence reads from the HCC1143 lymphoblastoid normal cell line (HCC1143_BL). Read-pairs from HCC1143_BL were randomly selected to achieve an average sequence coverage of 28.8. To simulate the matched normal, we further randomly selected read-pairs from HCC1143_BL to obtain a subsampled BAM at a mean coverage of 57.7, with no read-pairs in common with the 28.8x BAM. All reads were aligned with BWA-MEM using default parameters with the SpeedSeq pipeline (Chiang et al. 2015).

*Identifying sites of viral integration*

The Refseq1.1 database was downloaded from <ftp://ftp.ncbi.nlm.nih.gov/refseq/release/viral/> and indexed with BWA. Assembled contigs from each local assembly window were mapped to both the human reference and viral database. To enrich for only junction-supporting contigs, contigs mapping entirely to the viral database were excluded. Only contigs with ≥ 50 bases unmapped to the human reference and ≥ 35 bases mapping to the viral reference were considered as candidates for supporting a viral insertion junction. The contigs were parsed to obtain the genomic location of the integration site, and scored to obtain read support using the same procedure as for non-viral SVs. The viral integration calls are then emitted directly in the VCF files. A BAM file containing all of the viral alignments can be optionally emitted.

*Variant Detection in TCGA*

SvABA called germline and somatic indels and rearrangements on 344 paired tumor-normal BAM files from The Cancer Genome Atlas (TCGA). The genomes were sequenced with 101 bp paired-end reads and aligned with BWA-MEM. SvABA was run using default parameters and using the dbSNP database of indels as a prior to reduce the number of germline indels misclassified as somatic. TCGA identification codes for these samples are listed in Supplemental Table 5.

*Indel calling with FreeBayes*

SpeedSeq (Chiang et al. 2015) was obtained from <https://github.com/hall-lab/speedseq>, which contained FreeBayes v0.9.21. Indel variants were called using: speedseq somatic <ref.fa> <norm.bam> <tum.bam> -o output –t 2. Variants were filtered to require genotype log-likelihood of greater than 4 that the variant was not homozygous reference. A variant was classified as somatic if it had no ALT reads in the normal, or 1 ALT read in the normal and > 20 tumor ALT reads, and if it had a genotype log-likelihood of > 4 for being homozygous reference.

*Rearrangement calling with LUMPY*

SVs with LUMPY were called using SpeedSeq (Chiang et al. 2015): speedseq sv –B <bam> –R <ref.fa> -t 2 –o output. All variants marked as PASS were accepted. Variants were classified as somatic if they contained at least four split (SR) or paired-end (PE) reads in the tumor and zero in the paired normal.

*Rearrangement calling with DELLY*

DELLY v0.7.3 was obtained from <https://github.com/tobiasrausch/delly>. Translocations, inversions, duplications and deletions were all called separately using default parameters and the provided exclusions file: -x human.hg19.excl.tsv. Variants were classified as somatic if they contained zero discordant or split reads in the paired normal and four or more variant reads in the tumor.

*Indel calling with Strelka*

Strelka 1.0.11 was obtained from <ftp://ftp.illumina.com/>. The provided default configuration in demo/strelka_demo_config.ini was used, but with isSkipDepthFilter set to 0 for whole-genome runs. Variants were classified as somatic if they contained zero ALT reads in the normal, or 1 ALT read in the normal and > 20 ALT reads in the tumor.

*Variant calling with Pindel*

Pindel was obtained from <https://github.com/genome/pindel> from commit 42aa4fb293f6aa976d082c575cb88229b4ecd3fb. The mean and standard deviation of the insert sizes was estimated from the first 10,000 reads to create the configuration file. Pindel was then run in small batches of 5 Mbp each using (for first window): pindel –f <ref.fa> -i config.txt –o output –c 1:1-5000000 -w 1 -x 3. Raw Pindel calls were concatenated across each window. The mean mapping quality of supporting reads was calculated from the raw Pindel files by summing the SUM_MS field and dividing by the total number of ALT reads. To maximize the detection performance, variants with a mean mapping quality of < 50 (maximum mapping quality = 60) were excluded. Variants were classified as somatic if they contained four or more variant-reads in the tumor and zero in the normal.

*Variant calling with NovoBreak*

NovoBreak v1.1.3rc was obtained from <https://sourceforge.net/projects/novobreak/> and run using default parameters and filtered using the filter_sv_icgc.pl script.

*Identifying sites of viral integration*

The Refseq1.1 database was downloaded from <ftp://ftp.ncbi.nlm.nih.gov/refseq/release/viral/> and indexed with BWA. Assembled contigs from each local assembly window were mapped to both the human reference and viral database. To enrich for only junction-supporting contigs, contigs mapping entirely to the viral database were excluded. Only contigs with ≥ 50 bases unmapped to the human reference and ≥ 35 bases mapping to the viral reference were considered as candidates for supporting a viral insertion junction. The contigs were parsed to obtain the genomic location of the integration site, and scored to obtain read support using the same procedure as for non-viral SVs. The viral integration calls are then emitted directly in the VCF files. A BAM file containing all of the viral alignments can be optionally emitted.

*Computational benchmarking*

All computational timings were performed on a 2.67 GHz Intel Xeon E7-8837 using the simulated tumor BAM (average depth of 35.9), available at data.broadinstitute.org/svaba/sim.15x.bam.

*Identification of complex clusters*

Complex clusters supporting putative templated-sequence insertion (TSI) fragments were identified by finding links of connected rearrangements with breakpoints separated by short distances. The pseudocode for the recursive clustering algorithm is:

SET A as collection of all SVs

SET T as distance threshold in bp for breakpoints to be considered linked

SET C as the cluster of SVs, initially containing one SV

CLUSTER(C) recursively cluster SVs linked from the initial SV

PROGRAM CLUSTER(C)

SET original_cluster_size = SIZE(C)

FOR each c ∈ C

FOR EACH a ∈ (A ∉ C)

IF BREAKDISTANCE(c,a) < T

C = C ∪ a

ENDFOR

ENDFOR

IF (SIZE(C) > original_cluster_size)

CLUSTER(C)

ELSE

RETURN C

END CLUSTER­­­­

*Whole-genome assemblies with Discovar de novo*

The HCC1143 *de novo* assembly was created using an unpublished tool called Discovar *de novo*, using default settings (David Jaffe, personal communication). The code for this tool is freely available at: <ftp://ftp.broadinstitute.org/pub/crd/DiscovarDeNovo/latest_source_code/LATEST_VERSION.tar.gz>

Discovar *de novo* shares much of the code from an earlier assembler, Discovar, for which the algorithm has been published (Weisenfeld et al. 2014), but has been adapted to allow the rapid assembly of mammalian-sized genomes. Discovar de novo requires, as input, a single-sample, PCR-free library, sequenced as 250 base paired reads to a coverage of approximately 60x.

Discovar *de novo* begins by creating a large map of all high-quality 60-mers present in the reads, and an observation count for each. The 60-mers observed more than 3 times amongst the reads are likely to be accurate genomic sequence, free from sequencing errors, and their number is bounded by the genome size. An assembly graph is created from this set of 60-mers. This graph is largely accurate, but has poor contiguity due to coverage drop-outs in difficult-to-sequence regions, and is badly tangled due to the relatively high frequency of perfect 60-mer repeats in a typical genome.

This initial graph is transformed into a graph of 200-mers by mapping the reads back onto the initial graph, and taking all unique paths across its nodes described by the reads as input sequence for construction. This 200-mer graph is also gappy, but much less tangled. This graph is then gap-filled and simplified using the techniques described for the Discovar algorithm.

*Variant calling from Discovar contigs with SVlib*

To extract variants from large assembled contigs, we built SVlib (github.com/walaj/svlib) to extract indels and SVs from alignments of contigs to the reference genome. The input to SVlib is a BAM file of long-sequence alignments, sorted by the sequence names. SVlib iterates through the BAM and stores any sequence with either a gapped alignment or with multiple alignments (candidate SV) for further processing. The CIGAR strings of the alignments are parsed to extract candidate indel locations in both contig and reference coordinates, and the multipart alignments are parsed to provide candidate SV breakpoints in long-sequence and reference coordinates.

SVlib genotypes the variants by aligning short read sequences to the long-sequences and obtaining the number variant-supporting reads. For each candidate variant, SVlib extracts the reads from the regions covered by the alignment of the long-sequence to the reference. The reads are then aligned to the long-sequences with BWA-MEM, and reads with alignments that span the breakpoints are counted as variant-supporting reads. The genotype calculations and somatic versus germline classifications are performed as described above.

*Statistical calculations and plotting software*

All statistical calculations were performed using R-3.3.0. The two-sided Fisher’s exact test was used for fold-enrichment calculations of categorical data using stats::fisher.test. For numerical data not expected to be normally distributed, the two-sided Wilcoxon signed-rank test was calculated using stats::wilcox.test. For numerical data that was approximately normally distributed, the Student’s t-test was calculated using stats::t.test. Circos plots were generated with RCircos (Zhang et al. 2013).

**References**

Chiang C, Layer RM, Faust GG, Lindberg MR, Rose DB, Garrison EP, Marth GT, Quinlan AR, Hall IM. 2015. SpeedSeq: ultra-fast personal genome analysis and interpretation. *Nat Meth* **12**: 966–968.

Li H. 2015. BFC: correcting Illumina sequencing errors. *Bioinformatics* **31**: 2885–2887.

Parfenov M, Pedamallu CS, Gehlenborg N, Freeman SS, Danilova L, Bristow CA, Lee S, Hadjipanayis AG, Ivanova EV, Wilkerson MD, et al. 2014. Characterization of HPV and host genome interactions in primary head and neck cancers. *Proceedings of the National Academy of Sciences* **111**: 15544–15549.

Simpson JT, Durbin R. 2012. Efficient de novo assembly of large genomes using compressed data structures. *Genome Res* **22**: 549–556.

Weisenfeld NI, Yin S, Sharpe T, Lau B, Hegarty R, Holmes L, Sogoloff B, Tabbaa D, Williams L, Russ C, et al. 2014. Comprehensive variation discovery in single human genomes. *Nature Publishing Group* **46**: 1350–1355.

Zhang H, Meltzer P, Davis S. 2013. RCircos: an R package for Circos 2D track plots. *BMC Bioinformatics* **14**: 244.
