# Supplementary material for: SvABA: genome-wide detection of structural variants and indels by local assembly
Source: HighWire-hosted journal article supplement (doi:10.1101/gr.221028.117), 2018-03-13
Supplement: Supplemental_Table_S2.docx [file Supplemental_Table_S2.docx]

| **Cluster ID** | **SvABA Contigs** | **Breakpoints** |
| --- | --- | --- |
| 1 | 2:189263850(-)-6:61886042(-)__2_189262501_189287501D,c_2_189262501_189287501_18C,2:189263956(+)-10:63509616(+)__2_189262501_189287501D,3:94397120(-)-5:58489751(+)__5_58481501_58506501D,c_10_63504001_63529001_139C,c_10_63504001_63529001_142C | 3:94397120(-),5:58489751(+);3:94397123(-),10:63509463(-);5:58489751(+),10:63509616(+);2:189263850(-),6:61886042(-);2:189263956(+),5:58489591(-);2:189263956(+),10:63509616(+) |
| 2 | 3:183077721(-)-5:139283678(-)__5_139282501_139307501D,c_7_82295501_82320501_110C,5:139283988(+)-21:43298156(+)__21_43291501_43316501D,c_21_43291501_43316501_99C,c_21_43291501_43316501_197C | 3:183077721(-),5:139283678(-);5:139283988(+),7:82301991(+);5:139283988(+),21:43298156(+);7:82243152(-),21:43298529(-);7:82301822(-),21:43298156(+) |
| 3 | c_6_54145001_54170001_154C,6:54168190(+)-16:67685900(+)__16_67669001_67694001D,9:134440348(-)-13:25542515(-)__9_134431501_134456501D,9:134440578(+)-16:67685754(-)__16_67669001_67694001D | 6:54168190(+),15:-76854196(-);9:-134440348(-),13:25542515(-);6:54168190(+),16:67685900(+);9:134440578(+),16:67685754(-) |
| 4 | 1:186641955(-)-1:188587071(+)__1_188576501_188601501D,c_12_67497501_67522501_31C,1:188586912(-)-6:144981472(+)__1_188576501_188601501D,c_21_33712001_33737001_144C,c_12_67497501_67522501_28C,c_6_144966501_144991501_150C | 3:13587471(+),6:-144981368(-);1:186641955(-),1:188587071(+);1:188586912(-),6:144981472(+);1:186641956(-),12:67508656(+);1:188587071(+),12:67508462(-);1:188586913(-),21:33715832(-) |
| 5 | c_3_85211001_85236001_0C,c_1_6517001_6542001_11C | 1:6525379(+),3:85232671(-);3:85232671(-),3:85236302(-);1:6525379(+),3:85236506(+) |
| 6 | c_10_12960501_12985501_190C | 5:75884088(+),7:43683402(+);5:75883875(-),10:12976287(+) |
| 7 | c_7_47824001_47849001_141C,c_7_47824001_47849001_122C | 7:47827488(-),21:14853817(+);7:47827665(+),7:57445581(-) |
| 8 | c_7_82222001_82247001_137C,7:82245368(+)-17:20014937(-)__7_82222001_82247001D,c_10_53091501_53116501_11C | 7:82245368(+),10:53109082(-);7:82245368(+),17:20014937(-);10:53109197(+),17:20014938(-) |
| 9 | 7:62203115(+)-7:86956479(-)__7_86950501_86975501D,c_8_135411501_135436501_79C,c_8_135411501_135436501_5C | 7:62203115(+),7:86956479(-);7:62203115(+),8:135426761(+);7:86956480(-),8:135426627(-) |
| 10 | 6:5651904(-)-7:137130159(-)__7_137126501_137151501D,c_10_37460501_37485501_107C,7:137130025(-)-10:37484693(-)__10_37460501_37485501D | 6:5651904-5651904-,7:137130159-137130159-;6:5651987-5651987+,10:37484694-37484694-;7:137130025-137130025-,10:37484693-37484693- |
| 11 | c_8_87146501_87171501_178C,c_8_87146501_87171501_188C,c_8_87146501_87171501_209C | 8:87171173-87171173+,8:87216053-87216053+;8:87171422-87171422-,8:87217099-87217099+;8:87171645-87171645+,8:87213467-87213467- |
| 12 | c_4_83741001_83766001_1C,c_4_83741001_83766001_158C,8:97336520(-)-8:98250842(+)__8_98245001_98270001D | 8:97336520-97336520-,8:98250842-98250842+;4:83745022-83745022-,8:98250842-98250842+;4:83745137-83745137+,8:97336521-97336521- |
| 13 | c_9_126028001_126053001_208C,c_22_28885501_28910501_11C,c_11_76611501_76636501_78C,9:126052312(+)-22:28895606(-)__22_28885501_28910501D,21:15703800(-)-22:28895892(+)__22_28885501_28910501D | 6:58778586(+),9:126052118(-);9:126052312(+),11:76612358(-);7:30024792(-),22:28895892(+);9:126052312(+),22:28895606(-);21:15703800(-),22:28895892(+) |
| 14 | c_1_200851001_200876001_40C,1:200869362(+)-5:164357885(-)__1_200851001_200876001D,c_10_29645001_29670001_154C | 5:164357886-164357886-,10:29662578-29662578+;1:200869361-200869361+,10:29662499-29662499-;1:200869362-200869362+,5:164357885-164357885- |
| 15 | c_4_7325501_7350501_53C,10:52749186(-)-10:52793704(+)__10_52748501_52773501D,10:52749187(-)-10:53029380(+)__10_53018001_53043001D,c_10_53018001_53043001_117C | 10:52749186(-),10:52793704(+);10:-52749187(-),10:53029380(+);10:52793145(-),10:53029379(+);4:7327180(+),10:53029104(-) |
| 16 | c_11_57942501_57967501_116C,c_11_62132001_62157001_37C | 8:48726299-48726299-,11:57956833-57956833-;11:57957757-57957757+,11:62136804-62136804- |
| 17 | c_11_63675501_63700501_7C,c_11_63675501_63700501_119C,11:63698243(+)-11:63698910(+)__11_63675501_63700501D | 11:63698233-63698233+,11:63701788-63701788+;11:63698238-63698238-,11:63703283-63703283-;11:63698243-63698243+,11:63698910-63698910+ |
| 18 | 11:59637052(-)-11:65279159(+)__11_65268001_65293001D,c_11_68257001_68282001_196C,c_12_33785501_33810501_124C,c_12_126346501_126371501_133C,c_11_68257001_68282001_105C,c_12_33785501_33810501_23C | 11:59637052(-),11:65279159(+);11:59637053(-),11:68277390(+);11:67548353(-),11:68277149(+);11:65278765(-),12:33805572(-);11:68276972(-),12:33806228(+);11:67548104(+),12:126365610(-) |
| 19 | c_14_21731501_21756501_60C,c_11_69580001_69605001_96C,c_14_21731501_21756501_87C | 11:69583969-69583969+,14:21732022-21732022-;11:69571870-69571870+,14:21732150-21732150+;14:21043352-21043352-,14:21732443-21732443+ |
| 20 | c_11_69702501_69727501_78C,c_11_69702501_69727501_31C | 8:102462746-102462746-,11:69712609-69712609+;8:114813691-114813691+,11:69712054-69712054- |
| 21 | 13:107978862(-)-13:107979523(-)__13_107971501_107996501D,c_18_3038001_3063001_2C | 13:107978862-107978862-,13:107979523-107979523-;13:107978933-107978933+,18:3047569-3047569-;13:107979430-107979430-,18:3047569-3047569- |
| 22 | c_13_109490501_109515501_7C,c_13_109588501_109613501_94C,13:109511485(-)-13:109511832(+)__13_109490501_109515501D,c_13_109490501_109515501_75C,c_13_109588501_109613501_93C,c_13_109588501_109613501_105C | 13:108212379-108212379-,13:109511838-109511838-;13:109511485-109511485-,13:109511832-109511832+;13:109511487-109511487-,13:109511629-109511629-;13:108212650-108212650+,13:109606647-109606647-;13:109511634-109511634+,13:109604745-109604745-;13:109511677-109511677-,13:109604552-109604552+ |
| 23 | c_1_222950001_222975001_166C,c_18_71638001_71663001_15C | 1:222960572-222960572+,1:222968671-222968671+;1:222968059-222968059-,18:71656469-71656469- |
| 24 | 3:41199415(+)-14:101370308(+)__3_41184501_41209501D,3:41199521(+)-23:86923584(-)__3_41184501_41209501D,11:80476323(+)-14:101370221(-)__14_101356501_101381501D,c_23_86901501_86926501_160C | 11:80476323-80476323+,14:101370221-101370221-;11:80476323-80476323+,X:86923753-86923753+;3:41199415-41199415+,14:101370308-101370308+;3:41199521-41199521+,X:86923584-86923584- |
| 25 | c_2_2744001_2769001_13C,c_2_2744001_2769001_14C,2:2756735(+)-17:34067394(+)__2_2744001_2769001D,c_17_1690501_1715501_55C,14:103425831(-)-17:34067394(+)__14_103414501_103439501D,c_17_1690501_1715501_94C | 14:103425831(-),17:34067394(+);9:75072884(+),17:1691905(+);17:1691800(-),17:34067221(-);2:2756519(-),6:52407128(-);2:2756735(+),14:103425919(+);2:2756735(+),17:34067394(+) |
| 26 | c_17_53581501_53606501_99C,c_21_42924001_42949001_52C,c_17_53581501_53606501_111C | 17:53603908-53603908-,17:53615044-53615044-;17:53604968-53604968+,17:53615638-53615638+;17:53604083-53604083+,21:42942941-42942941- |
| 27 | c_20_45888501_45913501_88C,c_20_45839501_45864501_46C,c_20_45839501_45864501_68C,20:45853889(+)-20:45897607(-)__20_45888501_45913501D | 8:10704532-10704532+,20:45853889-45853889+;20:45731942-45731942+,20:45853862-45853862-;20:45733029-45733029-,20:45853896-45853896+;8:10704386-10704386-,20:45897608-45897608-;20:45853889-45853889+,20:45897607-45897607- |
| 28 | c_2_115419501_115444501_79C,c_2_105521501_105546501_2C,2:105534250(+)-2:115433307(+)__2_115419501_115444501D | 1:205438456-205438456+,2:105534250-105534250+;1:205438263-205438263-,2:115433307-115433307+;2:105534250-105534250+,2:115433307-115433307+ |
| 29 | c_1_48265001_48290001_2C,c_1_70756001_70781001_151C | 1:48284513(-),1:70759228(+);1:51848768(+),1:70758651(-) |
| 30 | c_3_195240501_195265501_1C,c_3_195240501_195265501_125C,c_3_193942001_193967001_91C | 3:173225788-173225788-,3:193965508-193965508-;3:170034877-170034877-,3:195251330-195251330-;3:173225490-173225490+,3:195251276-195251276+ |
