# Supplementary material for: SvABA: genome-wide detection of structural variants and indels by local assembly
Source: HighWire-hosted journal article supplement (doi:10.1101/gr.221028.117), 2018-03-13
Supplement: Supplemental_Table_S3.docx [file Supplemental_Table_S3.docx]

| **PCR Target** | **Cluster ID / SvAVA contig** | **Primer Forward** | **Primer Reverse** | **Validation Status** | **Breakpoints** | **Number TSI Spanned** | **Predicted TSI** | **Sanger Sequencing** |
| --- | --- | --- | --- | --- | --- | --- | --- | --- |
| 1 | 29 | CACCACTGTCCAAGTGGGATTTA | CAGGTAAGGAGGGAGTCAGTAA | YES | 1:48284513(-),1:70759228(+);1:1:51848768(+),70758651(-) | 1 | AAGTGGAATAAAAAGAAATAAATAGTCCACGTCACACAAGAATCTCTAGTACAACCAGAATTAATGACCTGTTCACATTCTCTATTCTCTAACAGGCACCAAACTTCAAGTTACAGCTGCCTGTTTTCAACAAAGAAAAGAGGAAAAGAGTACCCTTGCTCACCAATACAATTAAAGTGTTTTAGGGAAACTCAAGTGGTGTAAAGGACATCAAAAAAAGTCATTACTTTATTTAAATAAAGTCCTCTTAAACCTTCAACATTAACTTTTACCTTTTTCAGACCCACAGGTATTCAGAGTTTGAAATACCTTACTTAAAAAACAAAAAAAAGATAAATAACTTACTGAAAACAAGCTTCCCATTTCTATCTGCATGCAAATCACATGTCTCCACCCTGCTGCTGTTTACTGACATTTCAAAACTACATGTTCAGAGTTGTGTTCCAGTCCACCTTGCAAAAAAAGCAAAGCATTCTGCACCTGTTTCTACCTACAAAATGGGAACCATAAGTATTACTGACTCCCTCCTTACCTGTCAAAGATTTAAGAAGATCACCTAGATGCTTCAAGAGCTTTGA | GTATATTTTTCTGTGAGTCTTATTCTAGACTTACATTCATGACACTCACATCGATTTTTTTTTCGTGGCTATTATCTCAATTTTCACTCATATCCAAAATTTTTTTACTATTTGACCACAGAGCCATGTTTATTCAAATTTATCTGCCATTTTTTAATGTCAGTCAATTAATAAACCTAATTGCAGCCAAATCCTTTTCACATTTCCTGCCCCCCAGCAACGCCATGATCAACTTTCCTTTCCCCCCAGTTGATGGTTTTAAAGGAGTTTATGGGAAAAATGCAAGGAGTATTTGTGATGCGCTTTACACCACTAGAGTTTCTGTAAAACAGTCTTAAAGCTTTGGCAATAAATGTTACCCTTTTCCGATTTTCTTTGATGAAAAGAGGGAGATACCTTACTTAGTTTGGTGCCAGATATAAAAAACATAATGAGAACAGGCTTTTAATTCTGGTTGGACTGCAGATCACATGTCTCCACCCTGCTTTTATTTCTTTTTATTCCACTTCCTACTCTCAGAGAGAGTAGGAAGTCCACCTGGGAGGGGAGGGGTTATTACCTGGAACGGTTTTTGTATGTTGAACCATTCTTATATTCCAGGAATAAATCCCCCTTGGAGATGGGG |
| 2 | 4 | GCTCCAGACAATAAGAACTGCA | GGACTGCTATTTAGCTCCTCTT | YES | 1:186641956(-),12:67508656(+);1:188587071(+),12:67508462(-) | 1 | AGAAAAGTTAATAGATTGTTGTACAGATCAGGAAATGAAAAGAAATTCTTTTCAGAAGCTTCTGTTCCTCTGTCCACAATACTAAGAAAGGATAAGCTCTCCTGAGCATTGTGGACCCTGCTTTCTCTCTGCACCCCCTCACCCTGTAAATTTCTTTTTTGTAAAAGACACTCTAACAACAGCTTTAGAAAGCA | NNGCAAGCATTCTGCACCTGTTTCTACCTACAAAATGGGAACCATAAGTATTACTGACTCCCTCCTTACCTGATCTCTGAGAGTATGAAGTGGAATAAAAAGAAATAAATAGTCCACGTCACACAAGAATCTCTAGTACAACCAGAATTAATGACCTGTTCACATTCTCTATTCTCTAACAGGCACCAAACTTCAAGTTACAGCTGCCTGTTTTCAACAAAGAAAAGAGGAAAAGAGTACCCTTGCTCACCAATACAATTAAGGTGTTTTAGGGAAACTCAAGTGGTGTAAAGGACATCAAAAAAAGTCATTACTTTCTTTCAATAAAGTCCTCTTAAACCTTCAACATTAACTTTTACCTTTTTCAGACCCACAGGTATTCAAAGTTTGAAATACCTTACTTAAAAAACAAAAAAAAGATAAATAACTTACTGAAAACAAGCTTCCCATTTCTATCTGCATGCAAATCACATGTCTCCACCCTGCTGCTGTTTACTGACATTTCAAAACTACATGTTCAGAGATGTGTTCCAGTTATTCTGAGAGGGGAGTGGTTATTACATTGAATGATTTTTGCATGTGGAACCATTCTTATATTCCCAGGAATAAATCCCACTTGGACATGGTGATG |
| 3 | 2 | AATACGGTAGTGGTGTGTGC | TCCTGGACTCCGACATTCT | YES | 5:139283988(+),7:82301991(+);7:82301822(-),21:43298156(+) | 1 | CAAACCAGAGTTGACTTTTAGTATATCAGAGACTTTCTTGAACTGTCTCTTAATTCCACGTGTTGAATGACACTGTATTTCAAATCATGTCTATACAGTAACATGGGATGAATTAGTACGTTTCCCAGTTATGTTTGGAAGGCCCGTAAGATGCTTGTTATTTTTTCTG | CATTTTGTTTAATTTTGTTCTAGTTTACTAGTAAGATAAGGGTACTTCTCTGTTCTTCGAGGTTTCTGTCCTTGAGACAGCTTTTGCTAGAGCAACAACTCCAAATATCACCATATCCAGTACACCTCCTGCGCAAAACGGTAAAACTGAGATCTTTGCCTGTTACCCCTCCGGCTTCCGCCCGAATGATATCAAAATAGACTTGTTTAAACATGGTGAAAGAATCAAAAAAGATGAACATTCCCATTTGTCTTTTTCTAAAGACAGGTCCTTCCATTTATTGTGGTGCCCCGAATTCGCTCCGACCACCAAGGAAGAACCCCCTTGCATACTTATCCCTTGACATTGTCATACCCTAACATTGTTTCTGGGGATAAAAACATGGGTGGTGGTGGTAGTGGTGGTGGTGGATCACGTGGAGTGAGTGCGGATGGTGATTTTTCTCCTCCTATGCCCTGTTTTCCGTCACCGTGGACTTTTCTTTCTTGACATCTTCCTTCATTCTTTCAGATGAAGGAG |
| 4 | 3 | CCTTGGCAGAGAGCATTGT | TCTCTTAAGGTGTAAACTCAACCC | YES | 6:54168190(+),16:67685900(+);6:54168190(+),15:-76854196(-) | 1 | ACCATGTTGGCCAGGTGGGTTTCGAACTCCTGACCTCAGGTGATCCACCTGCCTTGGCCTCCCAAAGTGCTGGGATTACAGGCCTGAGCCACCCCGCACCTGGCCTCTGCCT | NNTCCGTGAGATGTCTGATTTATTGTTCGATACTCACTTCTGTTATCATTTCAAATTTTGTCTCATGAAGCAACAACCACAATTATTATTTTTTGTCATTAAATTACTGCTTAGAGTATCCAACTTAAATCGAATTACTTACACAGATTTTTAGATCTTCCCTTCCTTCCCTTTTGGGGAAGCTAACCTACACAATTGCATCTCTTCCCCCAGGCGATAGAAAAAGGGCACCCTTGCTGTTCAATGTTTAAAAGGACTTTATTGAAAAAAAGTAAGGAGTTTTTTTGATGTCCTTTACACCATACTGAGTTTCCTAAAACCCTCTTAAACCTTCAACATTCACTGGTACCCTTTTCCTATTTTCTTGGATGAAAACAGGGAGATACCTTACTTAGTTTGGAGCCTGATATAAAAAACATAATGAAAACAGGTTATCCATTTCGGTCGGCCTGCAGATTCCTGTCTCCACCCTGTATTTGTTTCTTTTTATTTCACTTCCTACTCTCAGAGAGAGGTTCAAGTTATTCTGGGAGGAGAGGGGTAATTACCTTCAATGGTTTTTACCTGTTGAACCATTCCCATATTCCTGGTGACTCCCCCCCTTGGAGATGGGGA |
| 5 | 6 | GTACAGTCTCCAAGTATCTGGG | TCCCCGTAGCCAGTCCCT | YES | 5:75884088(+),7:43683402(+);5:75883875(-),10:12976287(+) | 1 | TTAAAAAAGCTTGATCTTGAAGTTTTTTAATGCATTTAATGAAATTCTATGTTCTATAAACTATGGAGCTTCATCTCACATCAACATCTGAAGTGATAATTTTGAAGGATTTCAAGCCATAAAAATCATTCAGTTCACTTTCTCATATATACTATTACTTGAAACTATGACTCAGTGATAAAAGTGGGGAAAGCACATATATTTTTTATAGAATTTAGATGCCAGCTCTCAAGTTCTTTTCTCAGGTTATGGGTAGGTTAATGGATGCCATCATTACTACCTTATGGATTTGT | AATATGGGGTTAAGAAAGGTTCACATACCCTGTGCTGAATGGTTAGCTTTCTCCCCTCGCGGAATGCTTCCTACTCTCTCCGAGAGGATGAGAAGTGATAAAAAACAGCAGCAGGGCCACGTTCTGTGAAATGCATGCAGATACAAATGGGAATCTTGTGTTCAGTTTCTCTATATCTTTTTTTTGCCTTATAAGTAAGGTATTTCAAACTCTGAATTCAAGGAAGACAGAAAAAGGTAAACCTTGCTCACCAAGGTTTAAAAGGACTTTTTTGGAAAAAAAAAAGGAGTTTTTTTGATGTCCTTTACAATTACTTTCTTTCCTAAAACACTCTTAAACCTTCGACGATAACTGTTACCTTTTTCCTCTTTTCTTTGATTCAAACAGGGAAATACCTTACTTAGTTTGGTGCCTGAGATAAAAAACTTAATGAAAACAGGCTTTCCATTCCGATCGGACTGCAAATTCCTTGGTGACACCCTGTATTTATTTCTTTTTATTCCACTTCCCACTCTCAGAGATGTGTTCAAGTTATTCTGGCAGGGGAAGGGAAGTATTCTGCAATTGTTTCTACCTGCTGAACCATTCTTATATTCCCACTGACTCCCCCCCTTGGAGATGGGGATCC |
| 6 | 13 | ACCGAGTGCAACATTCCTCT | AAACCAGCTTCCAGTCTCTG | YES | 6:58778586(+),9:126052118(-);9:126052312(+),11:76612358(-) | 1 | GTTTTTGTGCCTGAATAATATTCCCTTGCATGCCTGTGACACATTTTGTTTTATCTACTCACCTGCTGATGGTTGCTTTGGTCATTTCCATATTTTGGCTCCTGTGAGTAATGCTACTGTGAACATCAGTGACACTTATCTGTTCAAGTCCCTGATTTTAATTCTTCTGGATGTACGTCTAGGAGTGGAACTGC | NNAGCGTCTCTCCTCTCATGCATTTCCATCGCATGCTATGATCGTTCATCACAGAATTAGAGAAAAGCAATCCTATAACCCATAGGGAGCCAAAAAAGAGCCCGCAAGGCCAGACAAAGCAAAAAAAAAAAAAAATATATTTTTAATTTTTTTTTTGTGCTGGCCATCTCCTTAATTATTTTTTTTTTTTTTTTTTTCTTTCTGTCGCCCCCCCCCCCCCAATGAAAAAGAAAAAGAGAACCGTTAATGACCAATACTTAAAAGGACTTTATTGAAAAAAAGTAAGGAGTTTTTGACATCACCTTTACACCATACTTTCTTTCAATAAAACACTCTTATTCCTTTGACGTTAACTGTTACCCTTTTCCTATTTTCTTGGTTGAAAACAGGGAGATACCTTACTTAGTTTGGTGCCTGATATAAAAAACATAATGAAAACAGGCTACCAATTCTGGTCGGACTACAAATCACATTTCTCCACCCTCTATTTGTTTATTTTTATTCCACTTCCTACTCTCAGAGATGGGTTCAAGTCCACCTGGCAGAGAAGGGGATATTATCTTGAATGGTTTCTGCCTGTTGAACCATAACTTATATTCCTACTGACTCCCCCACTTGGACGAGGGGG |
| 7 | c_23_57011501_57036501_1C | CCCACAAAGAAGAAAAGCCC | GTCCAAGCCATGTTCTCCAA | YES | X:57017530(-),11:58670083(-) | 1 | GCCTCCCAAAGAGATCGGATTACAGGAATGAGCTGTAAT | AAGTATGTGTACTTTATTGTTTTATAACTTGTGATTAAAGGTTTGCTTTCTTTGCAGGCGGACTGGTTCCTACTCTCTCCTTGAAGATTTGAAGTGACAGTAAAAAGCAGCAGGGCGTAGACATGTGATTTGCATGCAGATACAAATGTTAATGTTGTTTTCGTAAGTTAATTATCTTTTTTTTGCCATTTAAGTAAGGTATGCTGACTCTGAATACCTGTGGGACAGAAAAAGAGAACAGTTAATGCCCAAGGCTTAAAAGGACTTTATTGAAAACTCGAAAGGAGTTTTTTACATCACCTTTACACCACTTGAGTTTCCCTAAAACACTTTTATTGCATCGGTGAGCACTGTTACCTTTTTCCTATTCTCTTTGATTCAGACAGGGAAGTACCTTATTTAGTAAACCAGCCTGATATAAAAAACTTAATGAGAACAGGCTTTTCATTTTGATCGGACTACAGATTCCATGTCTCCGTGGACTATTTGTTTCTGACATTTCCACTTCCCATGCTCAGAGAGAGGTTGAAGTCCTCCTGGCAGGGGAGGGGAAATTACCTGGAATGGTTTTTACCTGTTGAACCATTCTTATATTCCAGGAATACTCCCCCACTTGGAGATGGGGGA |
| 8 | 15 | GTAACTCAGGGATGGAAGGTAAAT | TTCACGCATGCACCTCAAAA | YES | 10:52749186(-),10:52793704(+);10:-52749187(-),10:53029380(+);10:52793145(-),10:53029379(+) | 2 | GGTAAATGCTGTGTCTCACAGCTAGTAAGTCGTAAGTGATGGAGCCACAATTTGAAGTCAGTCTCACTATAGGACATGTACCCTTTCCC;TCTCACTATCTCTGTTGTCCCTTTAAGATTTAAATCTTCTGAGGGTTCCTTTTCTCTTTAAGTCACTTTGAATATTATGTAGGCCACAGCATGCCTCACACCAGAGACAAT | GNNGGATGGTATGTGCAATGTTACATTGCTGTTTCTTTTAAGAACACCACTTTTTTTATCATTTTTCATACTTATAAATTATTTTTCTGACACTAAAGACTACCTTTCATATTGGATCAATCCGATGTATTTTTATAAAATAGTGTGTCAGCCAACACAACCTGTTTTTTAATTTTTAAATTACAAAGTTTAATCAAATTTATGTCACTTTAATTAATCCAAATTATTCACCAAAAAAGCAGCAGCTACTTTGTCTCTTTCACAAGTCCCTTCATCCCAACCATGGATCTAAGGAGATGTCCTTTACAATTACTGAGTTTCCCTAAAAAACTCTTAAAGCTTAGGTAAGAACTGGTACCCTTTTCCTATTTTCTTTGTTGAAGAGAGGGAGGTACCTTTTTTAATTTGGTGCCTGAGAGAGAAAAGAGAATGAAAACAGGCCATCCATTCCGGTCTTACTGCAGATTCTTGTGTGCCGTGTGCTTTTATTTCTTTTTAGTCACTTCCCACTCTCAGAGAGAGTAGGAAGTCATTCTTGGAGGGGAGGGGGGTGACCTGGAATTGTTTCTAGTATGTTGAACCATAACCATAATTCCAGGAGAAAACCCCCACTTGGAGAAGGGA |
| GADH Control | | ACCACAGTCCATGCCATCAC | TCCACCACCCTGTTGCTGTA | Control |  |  |  |  |
