# Supplementary material for: SvABA: genome-wide detection of structural variants and indels by local assembly
Source: HighWire-hosted journal article supplement (doi:10.1101/gr.221028.117), 2018-03-13
Supplement: Supplemental_Table_S4.docx [file Supplemental_Table_S4.docx]

| TCGA external ID | Tumor type | TSI rearrangements | Non-TSI rearrangements |
| --- | --- | --- | --- |
| BI-GBM-TCGA-06-0125-01A-01D-1490-08 | GBM | 6 | 105 |
| BI-GBM-TCGA-06-0171-01A-02D-A33C-08 | GBM | 0 | 49 |
| BI-GBM-TCGA-06-0190-01A-01D-1491-08 | GBM | 0 | 180 |
| WU-GBM-TCGA-06-0214-01A-02D-0512-09 | GBM | 42 | 468 |
| BI-GBM-TCGA-06-0221-10A-01D-A35R-08 | GBM | 3 | 70 |
| BI-GBM-TCGA-06-0686-10A-01D-1492-08 | GBM | 8 | 186 |
| BI-LUSC-TCGA-22-1016-01A-01D-1521-08 | LUSC | 5 | 190 |
| BI-GBM-TCGA-14-1034-02B-01D-2280-08 | GBM | 5 | 27 |
| BI-LUSC-TCGA-21-1076-01A-02D-1521-08 | LUSC | 0 | 45 |
| BI-LUSC-TCGA-21-1078-11A-01D-1521-08 | LUSC | 0 | 2 |
| BI-LUSC-TCGA-21-1083-01A-01D-1521-08 | LUSC | 10 | 184 |
| BI-GBM-TCGA-19-1389-10D-01D-2364-08 | GBM | 0 | 29 |
| WU-GBM-TCGA-26-1438-10A-01D-0703-09 | GBM | 1 | 23 |
| BI-LUAD-TCGA-64-1678-01A-01D-1040-01 | LUAD | 3 | 84 |
| BI-LUAD-TCGA-64-1680-01A-02D-1040-01 | LUAD | 0 | 13 |
| BI-GBM-TCGA-02-2483-10A-01D-1494-08 | GBM | 1 | 46 |
| BI-GBM-TCGA-27-2523-10A-01D-1494-08 | GBM | 5 | 118 |
| BI-GBM-TCGA-14-2554-01A-01D-1494-08 | GBM | 2 | 64 |
| BI-LUSC-TCGA-34-2596-01A-01D-0963-08 | LUSC | 0 | 50 |
| BI-GBM-TCGA-19-2620-10A-01D-1495-08 | GBM | 1 | 45 |
| BI-GBM-TCGA-19-2624-01A-01D-1495-08 | GBM | 29 | 181 |
| BI-LUAD-TCGA-44-2656-01B-06D-A46W-08 | LUAD | 0 | 46 |
| BI-LUAD-TCGA-44-2659-01A-01D-1931-08 | LUAD | 5 | 51 |
| BI-COAD-TCGA-A6-2677-01A-01D-A46W-08 | COAD | 13 | 164 |
| BCM-COAD-TCGA-A6-2680-10A-01D-2188-10 | COAD | 0 | 12 |
| BCM-COAD-TCGA-A6-2681-10A-01D-2188-10 | COAD | 3 | 99 |
| BI-COAD-TCGA-A6-2684-01A-01D-A46W-08 | COAD | 1 | 8 |
| BI-LUSC-TCGA-60-2698-01A-01D-1522-08 | LUSC | 13 | 177 |
| BI-LUSC-TCGA-60-2713-01A-01D-1522-08 | LUSC | 3 | 91 |
| BI-LUSC-TCGA-60-2719-11A-01D-1522-08 | LUSC | 5 | 88 |
| BI-LUSC-TCGA-60-2724-11A-01D-1522-08 | LUSC | 0 | 71 |
| BI-LUSC-TCGA-66-2744-11A-01D-A320-08 | LUSC | 7 | 201 |
| BI-LUSC-TCGA-66-2756-11A-01D-1180-08 | LUSC | 15 | 263 |
| BI-LUSC-TCGA-66-2757-01A-01D-1180-08 | LUSC | 2 | 43 |
| BI-LUSC-TCGA-66-2759-11A-01D-A320-08 | LUSC | 6 | 197 |
| BI-LUSC-TCGA-66-2766-11A-01D-1180-08 | LUSC | 9 | 681 |
| BI-LUSC-TCGA-66-2789-01A-01D-A320-08 | LUSC | 2 | 133 |
| BI-LUSC-TCGA-66-2795-01A-02D-A320-08 | LUSC | 7 | 136 |
| BI-LUSC-TCGA-43-3394-11A-01D-1553-08 | LUSC | 10 | 95 |
| BI-LUSC-TCGA-18-3408-11A-01D-A320-08 | LUSC | 6 | 81 |
| BCM-COAD-TCGA-AA-3514-01A-02D-1554-10 | COAD | 0 | 7 |
| BCM-COAD-TCGA-AA-3518-10A-01D-1525-10 | COAD | 0 | 15 |
| BCM-COAD-TCGA-AA-3534-01A-01D-1525-10 | COAD | 1 | 5 |
| HMS-COAD-TCGA-AA-3555-10A-01D-1638-02 | COAD | 0 | 6 |
| BCM-COAD-TCGA-AA-3666-01A-02D-1981-10 | COAD | 1 | 67 |
| BCM-COAD-TCGA-A6-3807-10A-01D-1459-10 | COAD | 2 | 117 |
| BI-COAD-TCGA-A6-3809-10A-01D-A46W-08 | COAD | 1 | 12 |
| BI-LUAD-TCGA-44-3917-10A-01D-A46W-08 | LUAD | 18 | 212 |
| BI-LUAD-TCGA-44-3918-10A-01D-A46W-08 | LUAD | 12 | 110 |
| BI-LUSC-TCGA-43-3920-01A-01D-1553-08 | LUSC | 4 | 132 |
| HMS-COAD-TCGA-AA-3956-10A-01D-1167-02 | COAD | 0 | 33 |
| BCM-COAD-TCGA-AA-3977-10A-01D-1024-10 | COAD | 0 | 14 |
| BI-LUAD-TCGA-44-4112-01B-06D-A46W-08 | LUAD | 5 | 70 |
| BI-LUSC-TCGA-37-4135-10A-01D-A320-08 | LUSC | 21 | 407 |
| BI-LUAD-TCGA-05-4398-01A-01D-1931-08 | LUAD | 5 | 117 |
| BI-LUAD-TCGA-49-4512-11A-01D-1855-08 | LUAD | 7 | 52 |
| BI-LUSC-TCGA-33-4586-01A-01D-A320-08 | LUSC | 4 | 118 |
| HMS-LUAD-TCGA-73-4659-01A-01D-1203-02 | LUAD | 0 | 28 |
| BI-LUSC-TCGA-18-4721-11A-01D-1441-08 | LUSC | 2 | 89 |
| BI-HNSC-TCGA-CN-4741-10A-01D-2268-08 | HNSC | 1 | 33 |
| BI-LUAD-TCGA-50-5066-10A-01D-1625-08 | LUAD | 2 | 60 |
| BI-GBM-TCGA-26-5132-01A-01D-1486-08 | GBM | 8 | 57 |
| HMS-LUAD-TCGA-75-5147-10A-01D-1623-02 | LUAD | 3 | 51 |
| BI-HNSC-TCGA-BA-5153-01A-01D-2268-08 | HNSC | 0 | 21 |
| BI-LUSC-TCGA-34-5240-10A-01D-1441-08 | LUSC | 2 | 39 |
| BCM-HNSC-TCGA-CR-5250-10A-01D-2276-10 | HNSC | 1 | 29 |
| BCM-LIHC-TCGA-CC-5260-01A-01D-A12Z-10 | LIHC | 5 | 76 |
| BCM-LIHC-TCGA-CC-5261-10A-01D-A12Z-10 | LIHC | 1 | 33 |
| BCM-HNSC-TCGA-CN-5365-10A-01D-2276-10 | HNSC | 2 | 87 |
| BI-GBM-TCGA-06-5411-10A-01D-1696-08 | GBM | 0 | 25 |
| BCM-HNSC-TCGA-CV-5431-11A-01D-A32X-10 | HNSC | 9 | 97 |
| BCM-HNSC-TCGA-CV-5432-10A-01D-A32X-10 | HNSC | 8 | 222 |
| BCM-HNSC-TCGA-CV-5442-01A-01D-2266-10 | HNSC | 2 | 39 |
| BI-HNSC-TCGA-CV-5443-01A-01D-2268-08 | HNSC | 1 | 28 |
| BI-LUSC-TCGA-22-5477-01A-01D-1632-08 | LUSC | 4 | 117 |
| BI-LUSC-TCGA-22-5485-01A-01D-1632-08 | LUSC | 2 | 75 |
| BI-LUSC-TCGA-22-5492-01A-01D-1632-08 | LUSC | 6 | 66 |
| BCM-HNSC-TCGA-BA-5556-10A-01D-A32X-10 | HNSC | 0 | 25 |
| BCM-HNSC-TCGA-DQ-5629-10A-01D-A32X-10 | HNSC | 5 | 170 |
| BI-COAD-TCGA-A6-5656-10A-01D-A46W-08 | COAD | 4 | 57 |
| BI-COAD-TCGA-A6-5659-01B-04D-A46W-08 | COAD | 0 | 12 |
| BI-LUSC-TCGA-43-5670-10A-01D-A320-08 | LUSC | 12 | 206 |
| BI-LUSC-TCGA-21-5782-10A-01D-1632-08 | LUSC | 6 | 305 |
| BI-LUAD-TCGA-50-5932-01A-11D-1753-08 | LUAD | 1 | 43 |
| BCM-HNSC-TCGA-CN-6011-10A-01D-A32X-10 | HNSC | 8 | 107 |
| HMS-LUAD-TCGA-44-6146-11A-01D-1751-02 | LUAD | 7 | 234 |
| BI-LUAD-TCGA-44-6147-10A-01D-A46W-08 | LUAD | 4 | 34 |
| BI-LUAD-TCGA-75-6203-10A-01D-1753-08 | LUAD | 1 | 17 |
| BI-PRAD-TCGA-G9-6336-01A-11D-1786-08 | PRAD | 0 | 10 |
| BCM-HNSC-TCGA-CR-6467-10A-01D-2266-10 | HNSC | 2 | 47 |
| BI-HNSC-TCGA-CR-6470-10A-01D-2334-08 | HNSC | 2 | 17 |
| BI-HNSC-TCGA-CR-6482-01A-11D-2268-08 | HNSC | 0 | 14 |
| BI-HNSC-TCGA-CR-6487-10A-01D-2268-08 | HNSC | 2 | 37 |
| HMS-LUAD-TCGA-50-6591-11A-01D-1751-02 | LUAD | 6 | 107 |
| BCM-COAD-TCGA-AZ-6601-01A-11D-1771-10 | COAD | 0 | 23 |
| BCM-COAD-TCGA-CA-6717-01A-11D-1835-10 | COAD | 0 | 19 |
| BCM-COAD-TCGA-CA-6718-10A-01D-1835-10 | COAD | 0 | 18 |
| BI-LUAD-TCGA-44-6775-10A-01D-A46W-08 | LUAD | 0 | 19 |
| BI-COAD-TCGA-A6-6780-01B-04D-A46W-08 | COAD | 3 | 100 |
| BCM-COAD-TCGA-A6-6781-10A-01D-1924-10 | COAD | 1 | 31 |
| BI-LUAD-TCGA-91-6840-10A-01D-1946-08 | LUAD | 9 | 99 |
| BI-LUSC-TCGA-77-6843-10A-01D-1945-08 | LUSC | 6 | 110 |
| BI-LUAD-TCGA-91-6847-11A-01D-1945-08 | LUAD | 14 | 135 |
| BCM-HNSC-TCGA-BA-6869-10A-01D-A32X-10 | HNSC | 2 | 109 |
| BCM-HNSC-TCGA-BA-6872-01A-11D-A32X-10 | HNSC | 10 | 238 |
| BCM-HNSC-TCGA-CV-6956-01A-21D-A32X-10 | HNSC | 9 | 118 |
| BCM-COAD-TCGA-AD-6964-01A-11D-1924-10 | COAD | 0 | 30 |
| BI-LUAD-TCGA-55-6972-11A-01D-1945-08 | LUAD | 3 | 81 |
| BI-LUAD-TCGA-55-6982-01A-11D-1945-08 | LUAD | 1 | 117 |
| BI-LUAD-TCGA-55-6984-01A-11D-1945-08 | LUAD | 0 | 13 |
| BI-LUAD-TCGA-55-6986-11A-01D-1945-08 | LUAD | 0 | 7 |
| BCM-HNSC-TCGA-CN-6989-10A-01D-A32X-10 | HNSC | 4 | 76 |
| BCM-HNSC-TCGA-CN-6994-01A-11D-A32X-10 | HNSC | 7 | 92 |
| BI-LUAD-TCGA-75-7030-01A-11D-1945-08 | LUAD | 0 | 1 |
| BCM-HNSC-TCGA-CX-7086-10D-01D-A32X-10 | HNSC | 9 | 212 |
| BI-HNSC-TCGA-CV-7100-01A-11D-2268-08 | HNSC | 0 | 43 |
| BI-LUSC-TCGA-77-7139-10A-01D-A320-08 | LUSC | 2 | 65 |
| BI-LUAD-TCGA-78-7156-01A-11D-2036-08 | LUAD | 0 | 22 |
| BI-LUAD-TCGA-78-7158-01A-11D-2036-08 | LUAD | 0 | 18 |
| HMS-PRAD-TCGA-HI-7169-10A-01D-2111-02 | PRAD | 0 | 14 |
| BCM-HNSC-TCGA-CV-7180-01A-11D-2266-10 | HNSC | 1 | 25 |
| BCM-HNSC-TCGA-CV-7255-01A-11D-2276-10 | HNSC | 2 | 130 |
| BI-LUAD-TCGA-55-7281-10A-01D-2036-08 | LUAD | 1 | 14 |
| BCM-HNSC-TCGA-CR-7382-01A-11D-A32X-10 | HNSC | 0 | 26 |
| BI-HNSC-TCGA-CR-7385-10A-01D-2268-08 | HNSC | 1 | 12 |
| BI-HNSC-TCGA-CR-7391-01A-11D-2334-08 | HNSC | 0 | 1 |
| BI-HNSC-TCGA-CV-7416-01A-11D-2334-08 | HNSC | 4 | 61 |
| BI-PRAD-TCGA-G9-7522-10A-01D-2260-08 | PRAD | 0 | 3 |
| BI-LUAD-TCGA-78-7535-01A-11D-2063-08 | LUAD | 1 | 39 |
| BI-LUSC-TCGA-96-7545-01A-21D-A320-08 | LUSC | 6 | 77 |
| BI-LUSC-TCGA-56-7582-01A-11D-A320-08 | LUSC | 4 | 89 |
| BI-PRAD-TCGA-HC-7737-01A-11D-2114-08 | PRAD | 0 | 71 |
| BI-PRAD-TCGA-HC-7740-01A-11D-2114-08 | PRAD | 1 | 11 |
| BCM-HNSC-TCGA-HD-7753-01A-11D-A32X-10 | HNSC | 4 | 113 |
| BI-LUSC-TCGA-68-7755-01A-11D-A320-08 | LUSC | 12 | 107 |
| BI-LUSC-TCGA-90-7767-01A-11D-A320-08 | LUSC | 0 | 70 |
| BI-PRAD-TCGA-EJ-7791-01A-11D-2114-08 | PRAD | 1 | 30 |
| BI-LUSC-TCGA-52-7812-01A-11D-A320-08 | LUSC | 3 | 58 |
| BI-LUSC-TCGA-98-8022-10A-01D-2244-08 | LUSC | 1 | 90 |
| BI-LUSC-TCGA-85-8052-01A-11D-2244-08 | LUSC | 2 | 84 |
| BI-LUSC-TCGA-92-8064-01A-11D-2244-08 | LUSC | 5 | 70 |
| BI-LUAD-TCGA-97-8171-10A-01D-2284-08 | LUAD | 14 | 326 |
| BI-LUSC-TCGA-68-8250-10A-01D-2293-08 | LUSC | 1 | 246 |
| BI-PRAD-TCGA-HC-8258-10A-01D-2260-08 | PRAD | 0 | 9 |
| BI-LUSC-TCGA-85-8277-01A-11D-2293-08 | LUSC | 14 | 161 |
| HMS-COAD-TCGA-AA-A01S-01A-21D-A079-02 | COAD | 1 | 72 |
| WU-BRCA-TCGA-AO-A03L-01A-41D-A19H-09 | BRCA | 14 | 361 |
| WU-BRCA-TCGA-AO-A03N-10A-01D-A19H-09 | BRCA | 8 | 127 |
| WU-BRCA-TCGA-AN-A04D-10A-01D-A314-09 | BRCA | 15 | 178 |
| WU-BRCA-TCGA-A2-A04P-01A-31D-A128-09 | BRCA | 10 | 1322 |
| WU-BRCA-TCGA-A2-A04T-10A-01D-A128-09 | BRCA | 8 | 410 |
| WU-BRCA-TCGA-A2-A04X-01A-21D-A19H-09 | BRCA | 9 | 318 |
| WU-BRCA-TCGA-A8-A075-10B-01D-A19H-09 | BRCA | 4 | 168 |
| WU-BRCA-TCGA-A8-A07B-10A-01D-A19H-09 | BRCA | 13 | 198 |
| WU-BRCA-TCGA-A8-A07I-10A-01D-A19H-09 | BRCA | 33 | 627 |
| WU-BRCA-TCGA-A8-A08B-10A-01D-A19H-09 | BRCA | 47 | 2281 |
| WU-BRCA-TCGA-A8-A08L-10A-01D-A19H-09 | BRCA | 8 | 384 |
| WU-BRCA-TCGA-A8-A08S-10A-01D-A19H-09 | BRCA | 17 | 204 |
| WU-BRCA-TCGA-A8-A092-10A-01D-A19H-09 | BRCA | 1 | 49 |
| WU-BRCA-TCGA-A8-A094-10A-01D-A19H-09 | BRCA | 4 | 158 |
| WU-BRCA-TCGA-A8-A09I-01A-22D-A19H-09 | BRCA | 8 | 377 |
| WU-BRCA-TCGA-A8-A09X-10A-01D-A19H-09 | BRCA | 2 | 81 |
| WU-BRCA-TCGA-AN-A0AT-10A-01D-A047-09 | BRCA | 41 | 644 |
| WU-BRCA-TCGA-BH-A0AV-01A-31D-A10Y-09 | BRCA | 13 | 395 |
| WU-BRCA-TCGA-BH-A0B3-10A-01D-A128-09 | BRCA | 5 | 522 |
| WU-BRCA-TCGA-BH-A0BW-10A-01D-A314-09 | BRCA | 0 | 115 |
| WU-BRCA-TCGA-A2-A0D0-01A-11D-A128-09 | BRCA | 14 | 337 |
| WU-BRCA-TCGA-A2-A0D4-10A-01D-A314-09 | BRCA | 4 | 182 |
| WU-BRCA-TCGA-BH-A0DG-11A-43D-A12Q-09 | BRCA | 22 | 372 |
| WU-BRCA-TCGA-BH-A0DT-11A-12D-A12B-09 | BRCA | 0 | 5 |
| WU-BRCA-TCGA-BH-A0EA-01A-11D-A314-09 | BRCA | 0 | 4 |
| WU-BRCA-TCGA-A2-A0EY-01A-11D-A19H-09 | BRCA | 22 | 351 |
| WU-BRCA-TCGA-AN-A0G0-10A-01D-A047-09 | BRCA | 8 | 168 |
| WU-BRCA-TCGA-BH-A0H0-10A-01D-A314-09 | BRCA | 9 | 217 |
| HMS-BRCA-TCGA-BH-A0H6-01A-21D-A060-02 | BRCA | 0 | 627 |
| WU-BRCA-TCGA-B6-A0I1-01A-11D-A21Q-09 | BRCA | 10 | 219 |
| WU-BRCA-TCGA-AO-A0J2-01A-11D-A19H-09 | BRCA | 13 | 514 |
| WU-BRCA-TCGA-AO-A0J4-01A-11D-A128-09 | BRCA | 3 | 756 |
| WU-BRCA-TCGA-AO-A0JM-10A-01D-A19H-09 | BRCA | 7 | 311 |
| HMS-BRCA-TCGA-B6-A0RE-10A-01D-A060-02 | BRCA | 0 | 99 |
| WU-BRCA-TCGA-A1-A0SM-01A-11D-A19H-09 | BRCA | 5 | 110 |
| WU-BRCA-TCGA-AR-A0TX-01A-11D-A19H-09 | BRCA | 9 | 322 |
| WU-BRCA-TCGA-BH-A0WA-10A-01D-A128-09 | BRCA | 2 | 127 |
| WU-BRCA-TCGA-B6-A0WX-10A-01D-A10G-09 | BRCA | 0 | 100 |
| WU-BRCA-TCGA-B6-A0X5-01A-21D-A314-09 | BRCA | 1 | 226 |
| WU-BRCA-TCGA-AN-A0XR-10A-01D-A10G-09 | BRCA | 2 | 54 |
| BI-THCA-TCGA-DE-A0Y3-10A-01D-A10S-08 | THCA | 0 | 1 |
| WU-BRCA-TCGA-A2-A0YG-10A-01D-A19H-09 | BRCA | 6 | 229 |
| BI-THCA-TCGA-BJ-A0Z2-10A-01D-A10S-08 | THCA | 1 | 8 |
| BI-THCA-TCGA-BJ-A0ZB-10A-01D-A10S-08 | THCA | 0 | 3 |
| WU-BRCA-TCGA-AO-A124-01A-11D-A10M-09 | BRCA | 15 | 748 |
| WU-BRCA-TCGA-AO-A12H-01A-11D-A10Y-09 | BRCA | 0 | 13 |
| WU-BRCA-TCGA-BH-A0DG-11A-43D-A12Q-09 | BRCA | 7 | 340 |
| WU-BRCA-TCGA-C8-A130-10A-01D-A19H-09 | BRCA | 9 | 343 |
| WU-BRCA-TCGA-A7-A13D-10A-02D-A12Q-09 | BRCA | 17 | 457 |
| HMS-THCA-TCGA-DJ-A13L-10A-01D-A221-26 | THCA | 0 | 2 |
| BI-THCA-TCGA-DJ-A13R-10A-01D-A10S-08 | THCA | 0 | 2 |
| BI-SKCM-TCGA-D9-A148-10A-01D-A19A-08 | SKCM | 0 | 64 |
| WU-BRCA-TCGA-E2-A14P-01A-31D-A19H-09 | BRCA | 6 | 461 |
| WU-BRCA-TCGA-E2-A14X-01A-11D-A10Y-09 | BRCA | 6 | 114 |
| BCM-LIHC-TCGA-DD-A1EJ-10A-01D-A152-10 | LIHC | 3 | 73 |
| WU-BRCA-TCGA-E2-A156-10A-01D-A314-09 | BRCA | 0 | 19 |
| WU-BRCA-TCGA-E2-A15E-01A-11D-A19H-09 | BRCA | 0 | 49 |
| WU-BRCA-TCGA-E2-A15H-01A-11D-A19H-09 | BRCA | 6 | 193 |
| WU-BRCA-TCGA-E2-A15K-11A-13D-A12Q-09 | BRCA | 1 | 67 |
| WU-BRCA-TCGA-E2-A15K-11A-13D-A12Q-09 | BRCA | 1 | 40 |
| BI-SKCM-TCGA-EE-A185-10A-01D-A198-08 | SKCM | 2 | 67 |
| WU-BRCA-TCGA-BH-A18R-11A-42D-A19H-09 | BRCA | 14 | 263 |
| WU-BRCA-TCGA-BH-A18U-01A-21D-A19H-09 | BRCA | 6 | 441 |
| HMS-THCA-TCGA-BJ-A191-01A-11D-A13U-02 | THCA | 0 | 2 |
| HMS-SKCM-TCGA-ER-A19D-10A-01D-A190-02 | SKCM | 4 | 20 |
| BI-SKCM-TCGA-ER-A19E-06A-11D-A197-08 | SKCM | 2 | 146 |
| BI-THCA-TCGA-EL-A3CV-01A-11D-A19J-08 | THCA | 5 | 44 |
| HMS-SKCM-TCGA-ER-A19T-06A-11D-A18Z-02 | SKCM | 46 | 259 |
| HMS-SKCM-TCGA-ER-A19T-06A-11D-A18Z-02 | SKCM | 48 | 278 |
| WU-BRCA-TCGA-AR-A1AY-01A-21D-A12Q-09 | BRCA | 2 | 97 |
| BCM-LIHC-TCGA-DD-A1E9-01A-21D-A152-10 | LIHC | 0 | 7 |
| BCM-LIHC-TCGA-DD-A1EB-11A-11D-A12Z-10 | LIHC | 17 | 160 |
| BCM-LIHC-TCGA-DD-A1ED-10A-01D-A152-10 | LIHC | 0 | 4 |
| BCM-LIHC-TCGA-DD-A1EG-01A-11D-A20W-10 | LIHC | 0 | 46 |
| BCM-LIHC-TCGA-DD-A1EH-11A-11D-A12Z-10 | LIHC | 0 | 16 |
| BCM-LIHC-TCGA-DD-A1EJ-10A-01D-A152-10 | LIHC | 6 | 91 |
| BCM-LIHC-TCGA-DD-A1EL-01A-11D-A152-10 | LIHC | 0 | 35 |
| WU-BRCA-TCGA-BH-A1FC-01A-11D-A13L-09 | BRCA | 4 | 117 |
| BCM-LIHC-TCGA-CC-A1HT-10A-01D-A12Z-10 | LIHC | 0 | 25 |
| BI-SKCM-TCGA-DA-A1HW-10A-01D-A19A-08 | SKCM | 8 | 197 |
| BI-SKCM-TCGA-DA-A1I0-10B-01D-A20D-08 | SKCM | 39 | 208 |
| BI-SKCM-TCGA-DA-A1I2-06A-21D-A19A-08 | SKCM | 3 | 35 |
| BI-SKCM-TCGA-DA-A1I8-10A-01D-A199-08 | SKCM | 2 | 74 |
| HMS-SKCM-TCGA-DA-A1IC-06A-11D-A18Y-02 | SKCM | 1 | 4 |
| WU-BRCA-TCGA-EW-A1J5-01A-11D-A13L-09 | BRCA | 4 | 47 |
| WU-BRCA-TCGA-E2-A1LG-11A-42D-A14K-09 | BRCA | 4 | 131 |
| WU-BRCA-TCGA-E2-A1LK-01A-21D-A14G-09 | BRCA | 5 | 210 |
| WU-BRCA-TCGA-E2-A1LL-01A-11D-A142-09 | BRCA | 20 | 520 |
| WU-BRCA-TCGA-E9-A1NH-01A-11D-A14G-09 | BRCA | 0 | 14 |
| WU-BRCA-TCGA-EW-A1P8-10A-01D-A314-09 | BRCA | 6 | 77 |
| WU-BRCA-TCGA-EW-A1PB-10A-01D-A142-09 | BRCA | 6 | 376 |
| WU-BRCA-TCGA-EW-A1PC-01B-11D-A21Q-09 | BRCA | 2 | 153 |
| WU-BRCA-TCGA-EW-A1PH-01A-11D-A17G-09 | BRCA | 11 | 347 |
| BI-SKCM-TCGA-D3-A1Q1-10A-01D-A198-08 | SKCM | 25 | 226 |
| BI-SKCM-TCGA-D3-A1Q5-10A-01D-A198-08 | SKCM | 0 | 70 |
| HMS-SKCM-TCGA-FS-A1ZD-06A-11D-A18Y-02 | SKCM | 9 | 170 |
| HMS-SKCM-TCGA-FS-A1ZK-06A-11D-A18Y-02 | SKCM | 17 | 304 |
| BI-SKCM-TCGA-FS-A1ZP-10A-01D-A199-08 | SKCM | 1 | 47 |
| BI-SKCM-TCGA-FS-A1ZU-10A-01D-A198-08 | SKCM | 3 | 111 |
| BCM-LIHC-TCGA-BC-A216-11A-11D-A152-10 | LIHC | 13 | 250 |
| BCM-LIHC-TCGA-BC-A217-10A-01D-A152-10 | LIHC | 17 | 379 |
| HMS-THCA-TCGA-FE-A22Z-10A-01D-A16N-02 | THCA | 0 | 7 |
| BCM-LIHC-TCGA-FV-A23B-01A-11D-A16V-10 | LIHC | 7 | 42 |
| HMS-SKCM-TCGA-EB-A24D-10A-01D-A190-02 | SKCM | 3 | 50 |
| WU-BRCA-TCGA-AR-A24Z-01A-11D-A314-09 | BRCA | 40 | 611 |
| WU-BRCA-TCGA-AR-A256-01A-11D-A167-09 | BRCA | 28 | 690 |
| WU-BRCA-TCGA-A2-A259-10A-01D-A17G-09 | BRCA | 0 | 30 |
| WU-BRCA-TCGA-A2-A25B-10A-01D-A167-09 | BRCA | 11 | 460 |
| BCM-LIHC-TCGA-G3-A25S-10A-01D-A16V-10 | LIHC | 16 | 144 |
| BCM-LIHC-TCGA-G3-A25T-10A-01D-A16V-10 | LIHC | 0 | 80 |
| BCM-LIHC-TCGA-DD-A3A9-01A-11D-A25V-10 | LIHC | 0 | 6 |
| BCM-LIHC-TCGA-G3-A25W-01A-11D-A16V-10 | LIHC | 0 | 30 |
| BCM-LIHC-TCGA-G3-A25Y-10A-01D-A16V-10 | LIHC | 0 | 83 |
| BI-SKCM-TCGA-GN-A262-10A-01D-A198-08 | SKCM | 14 | 135 |
| BI-SKCM-TCGA-GN-A264-10A-01D-A198-08 | SKCM | 8 | 178 |
| BI-SKCM-TCGA-GN-A266-10A-01D-A199-08 | SKCM | 1 | 38 |
| BI-SKCM-TCGA-GN-A26A-06A-11D-A19A-08 | SKCM | 3 | 108 |
| BI-SKCM-TCGA-GN-A26C-01A-11D-A19A-08 | SKCM | 0 | 27 |
| BI-BRCA-TCGA-A7-A26J-01A-11D-A46W-08 | BRCA | 1 | 40 |
| BI-BRCA-TCGA-A7-A26J-01A-11D-A46W-08 | BRCA | 7 | 91 |
| BCM-LIHC-TCGA-EP-A26S-10A-01D-A16V-10 | LIHC | 2 | 21 |
| WU-BRCA-TCGA-D8-A27F-10A-01D-A16D-09 | BRCA | 1 | 229 |
| WU-BRCA-TCGA-D8-A27H-10A-01D-A17G-09 | BRCA | 22 | 452 |
| BI-THCA-TCGA-BJ-A28V-10A-01D-A19M-08 | THCA | 0 | 5 |
| BI-SKCM-TCGA-EE-A29B-10A-01D-A199-08 | SKCM | 2 | 37 |
| BI-SKCM-TCGA-EE-A2A0-06A-11D-A196-08 | SKCM | 0 | 30 |
| WU-BRCA-TCGA-GI-A2C9-01A-11D-A21Q-09 | BRCA | 8 | 486 |
| BI-THCA-TCGA-EM-A2CN-10B-01D-A19M-08 | THCA | 0 | 3 |
| WU-BRCA-TCGA-GM-A2DF-10C-01D-A17W-09 | BRCA | 4 | 169 |
| BI-SKCM-TCGA-EE-A2GT-10A-01D-A199-08 | SKCM | 3 | 33 |
| BCM-LIHC-TCGA-ES-A2HT-11A-11D-A183-10 | LIHC | 0 | 13 |
| WU-BRCA-TCGA-AR-A2LK-10A-01D-A17W-09 | BRCA | 3 | 26 |
| HMS-SKCM-TCGA-EE-A2M5-06A-12D-A18Y-02 | SKCM | 0 | 23 |
| HMS-SKCM-TCGA-ER-A2NF-01A-11D-A18Z-02 | SKCM | 0 | 9 |
| HMS-SKCM-TCGA-ER-A2NF-01A-11D-A18Z-02 | SKCM | 0 | 8 |
| BI-THCA-TCGA-EM-A2OV-01A-11D-A202-08 | THCA | 0 | 4 |
| BI-THCA-TCGA-DJ-A2Q1-10A-01D-A19M-08 | THCA | 0 | 4 |
| BI-THCA-TCGA-DJ-A2Q2-10A-01D-A19M-08 | THCA | 0 | 1 |
| BI-THCA-TCGA-FY-A2QD-01A-11D-A19J-08 | THCA | 0 | 4 |
| BCM-LIHC-TCGA-DD-A3A6-11A-11D-A22F-10 | LIHC | 0 | 2 |
| BCM-LIHC-TCGA-DD-A3A7-01A-11D-A22F-10 | LIHC | 2 | 128 |
| BCM-LIHC-TCGA-DD-A3A9-01A-11D-A25V-10 | LIHC | 3 | 102 |
| BI-THCA-TCGA-EM-A3AQ-10A-01D-A20C-08 | THCA | 0 | 7 |
| BCM-LIHC-TCGA-G3-A3CK-01A-11D-A20W-10 | LIHC | 0 | 19 |
| BI-SKCM-TCGA-ER-A3ES-06A-11D-A20D-08 | SKCM | 1 | 63 |
| BI-SKCM-TCGA-DA-A3F3-10A-01D-A20D-08 | SKCM | 28 | 84 |
| BI-SKCM-TCGA-DA-A3F5-06A-11D-A20D-08 | SKCM | 1 | 110 |
| BI-THCA-TCGA-EM-A3FL-10A-01D-A21A-08 | THCA | 0 | 4 |
| BI-THCA-TCGA-EM-A3FQ-10A-01D-A21A-08 | THCA | 0 | 9 |
| HMS-THCA-TCGA-EM-A3FR-01A-11D-A221-26 | THCA | 0 | 3 |
| BI-THCA-TCGA-EL-A3H1-01A-11D-A21A-08 | THCA | 0 | 3 |
| BCM-LIHC-TCGA-FV-A3I1-10A-01D-A22F-10 | LIHC | 3 | 48 |
| BI-SKCM-TCGA-EE-A3J5-06A-11D-A20D-08 | SKCM | 2 | 24 |
| WU-BRCA-TCGA-A2-A3KC-01A-11D-A20S-09 | BRCA | 7 | 96 |
| BI-SKCM-TCGA-D3-A3MO-06A-11D-A21A-08 | SKCM | 25 | 130 |
| BI-THCA-TCGA-FK-A3S3-01A-11D-A22D-08 | THCA | 0 | 2 |
| BI-THCA-TCGA-FK-A3SE-01A-11D-A22D-08 | THCA | 0 | 1 |
| BI-THCA-TCGA-EL-A3TB-11A-11D-A22D-08 | THCA | 0 | 2 |
| WU-BRCA-TCGA-EW-A3U0-10A-01D-A22A-09 | BRCA | 16 | 969 |
| BI-THCA-TCGA-DJ-A3US-01A-11D-A22D-08 | THCA | 0 | 1 |
| WU-BRCA-TCGA-GM-A3XL-10A-01D-A22X-09 | BRCA | 63 | 632 |
| WU-BRCA-TCGA-A2-A3XX-10A-01D-A23C-09 | BRCA | 4 | 82 |
| WU-BRCA-TCGA-A2-A3Y0-10A-01D-A23C-09 | BRCA | 11 | 386 |
| BI-THCA-TCGA-E8-A418-01A-11D-A23M-08 | THCA | 1 | 3 |
| BCM-LIHC-TCGA-ED-A459-01A-11D-A25V-10 | LIHC | 20 | 209 |
| BI-THCA-TCGA-BJ-A45K-10A-01D-A23U-08 | THCA | 0 | 4 |
| WU-ESCA-TCGA-LN-A4A1-01A-21D-A27G-09 | ESCA | 17 | 237 |
| BI-THCA-TCGA-L6-A4ET-01A-11D-A257-08 | THCA | 0 | 2 |
| BCM-LIHC-TCGA-DD-A4NB-01A-12D-A25V-10 | LIHC | 0 | 26 |
| WU-ESCA-TCGA-L5-A4OJ-11A-12D-A27G-09 | ESCA | 20 | 192 |
| BCM-LIHC-TCGA-ED-A4XI-01A-11D-A25V-10 | LIHC | 0 | 29 |
| BCM-LIHC-TCGA-FV-A4ZQ-01A-11D-A25V-10 | LIHC | 8 | 31 |
| BCM-COAD-TCGA-NH-A50T-10A-01D-A28G-10 | COAD | 1 | 40 |
| BCM-COAD-TCGA-NH-A50V-10A-01D-A28G-10 | COAD | 0 | 55 |
| BCM-LIHC-TCGA-MR-A520-01A-11D-A25V-10 | LIHC | 0 | 14 |
| BCM-COAD-TCGA-AY-A54L-10A-01D-A28G-10 | COAD | 3 | 91 |
| BCM-COAD-TCGA-A6-A565-10A-01D-A28G-10 | COAD | 0 | 8 |
| BCM-COAD-TCGA-A6-A566-01A-11D-A28G-10 | COAD | 0 | 22 |
| BCM-COAD-TCGA-A6-A567-10A-01D-A28G-10 | COAD | 2 | 34 |
| BCM-COAD-TCGA-A6-A56B-01A-31D-A28G-10 | COAD | 12 | 123 |
| BCM-LIHC-TCGA-PD-A5DF-10A-01D-A27I-10 | LIHC | 8 | 417 |
| BCM-COAD-TCGA-AD-A5EJ-01A-11D-A28G-10 | COAD | 4 | 34 |
| BCM-COAD-TCGA-AD-A5EK-10A-01D-A28G-10 | COAD | 2 | 58 |
| BCM-LIHC-TCGA-HP-A5MZ-01A-21D-A27I-10 | LIHC | 0 | 7 |
| BCM-LIHC-TCGA-BW-A5NO-10A-01D-A27I-10 | LIHC | 6 | 260 |
| BCM-LIHC-TCGA-BW-A5NQ-10A-01D-A27I-10 | LIHC | 0 | 11 |
| WU-ESCA-TCGA-LN-A5U5-10A-01D-A28E-09 | ESCA | 5 | 111 |
| BCM-COAD-TCGA-QG-A5YV-10A-01D-A28G-10 | COAD | 1 | 10 |
| BCM-COAD-TCGA-QG-A5YX-01A-11D-A28G-10 | COAD | 1 | 44 |
| BCM-COAD-TCGA-QG-A5Z1-10A-01D-A28G-10 | COAD | 4 | 61 |
| BCM-COAD-TCGA-QG-A5Z2-01A-11D-A28G-10 | COAD | 1 | 21 |
| WU-ESCA-TCGA-L7-A6VZ-10A-01D-A33H-09 | ESCA | 5 | 152 |
| WU-ESCA-TCGA-L5-A891-11A-21D-A36M-09 | ESCA | 98 | 862 |
| WU-ESCA-TCGA-LN-A8I1-01A-11D-A36J-09 | ESCA | 20 | 300 |
| WU-ESCA-TCGA-L5-A8NE-01A-11D-A37C-09 | ESCA | 106 | 675 |
| WU-ESCA-TCGA-L5-A8NN-11A-11D-A37F-09 | ESCA | 9 | 94 |
| WU-ESCA-TCGA-IG-A97I-10A-01D-A38A-09 | ESCA | 4 | 127 |
| WU-ESCA-TCGA-LN-A9FQ-01A-31D-A387-09 | ESCA | 8 | 164 |
