# Supplementary material for: SvABA: genome-wide detection of structural variants and indels by local assembly
Source: HighWire-hosted journal article supplement (doi:10.1101/gr.221028.117), 2018-03-13
Supplement: Supplemental_Table_S5.docx [file Supplemental_Table_S5.docx]

| **TCGA tumor ID** | **Virus** | **Human Site** | **Viral site** | **Gene** | **Confirmed by Parfenov *et al*** |
| --- | --- | --- | --- | --- | --- |
| HNSC-TCGA-BA-4077-Tumor-SM-2XUPF | Human_papillomavirus_type_16,_complete_genome | ]14:68741695]T | 3434 | RAD51B-Intron | Yes |
| HNSC-TCGA-CN-4741-Tumor-SM-2XUPP | Human_papillomavirus_type_16,_complete_genome | T]13:73619895] | 2363 | Intergenic | Yes |
| HNSC-TCGA-CN-4741-Tumor-SM-2XUPP | Human_papillomavirus_type_16,_complete_genome | [11:76087548[G | 2419 | PRKRIR-Intron | Yes |
| HNSC-TCGA-CN-4741-Tumor-SM-2XUPP | Human_papillomavirus_type_16,_complete_genome | A]11:76096219] | 5812 | Intergenic (after PRKRIR) | Yes |
| HNSC-TCGA-CR-6487-Tumor-SM-2XUQ2 | Human_papillomavirus_type_16,_complete_genome | C]9:131856082] | 2710 | Intergenic (after DOLPP1) | Yes |
| HNSC-TCGA-CR-6487-Tumor-SM-2XUQ2 | Human_papillomavirus_type_16,_complete_genome | T]9:131845205] | 6951 | DOLPP1 | Yes |
| HNSC-TCGA-CR-6487-Tumor-SM-2XUQ2 | Human_papillomavirus_type_16,_complete_genome | [9:131856423[A | 7813 | Intergenic (after DOLPP1) | Yes |
| HNSC-TCGA-CR-7385-Tumor-SM-2XUPG | Human_papillomavirus_type_16,_complete_genome | ]21:43087534]A | 3404 | Intergenic (after TMPRSS2) | Yes |
| HNSC-TCGA-CR-7385-Tumor-SM-2XUPG | Human_papillomavirus_type_16,_complete_genome | [21:43098072[T | 3423 | Intergenic (after TMPRSS2) | Yes |
| HNSC-TCGA-CR-7385-Tumor-SM-2XUPG | Human_papillomavirus_type_16,_complete_genome | C]21:43059336] | 4420 | Intergenic (after TMPRSS2) | Yes |
| HNSC-TCGA-CR-7404-Tumor-SM-3GL6G | Human_papillomavirus_type_16,_complete_genome | G[4:161729098[ | 255 | Intergenic | Yes |
| HNSC-TCGA-CR-7404-Tumor-SM-3GL6G | Human_papillomavirus_type_16,_complete_genome | ]1:191334416]C | 2382 | Intergenic | Yes |
| HNSC-TCGA-CR-7404-Tumor-SM-3GL6G | Human_papillomavirus_type_16,_complete_genome | [1:191334422[G | 7240 | Intergenic | Yes |
| HNSC-TCGA-CV-5443-Tumor-SM-2XUPK | Human_papillomavirus_type_16,_complete_genome | [9:5388153[T | 1572 | PLGRKT-Intron | Yes |
| HNSC-TCGA-CV-5443-Tumor-SM-2XUPK | Human_papillomavirus_type_16,_complete_genome | T]9:5464246] | 7849 | CD274-Intron | Yes |
| HNSC-TCGA-CV-6961-Tumor-SM-2XUPN | Human_papillomavirus_type_16,_complete_genome | ]21:40187057]T | 5573 | ETS2-Intron | Yes |
