# Supplementary figures and images for: SvABA: genome-wide detection of structural variants and indels by local assembly
Source: HighWire-hosted journal article supplement (doi:10.1101/gr.221028.117), 2018-03-13

**Supplemental Figure 4**

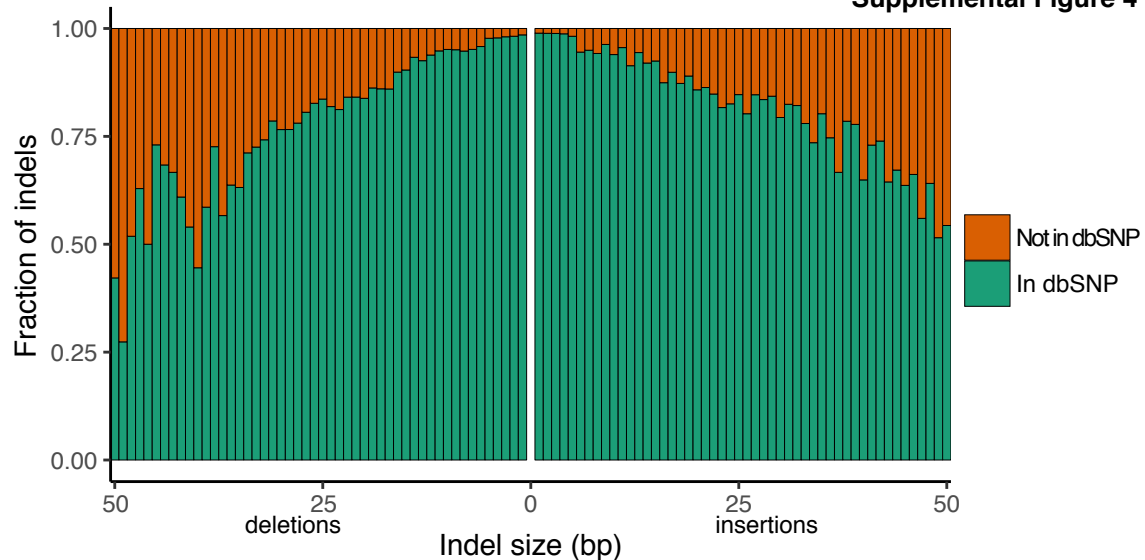

Supplement: Supplemental_Fig_S4.pdf [file Supplemental_Fig_S4.pdf]

**A**

Simulate SVs from power-law

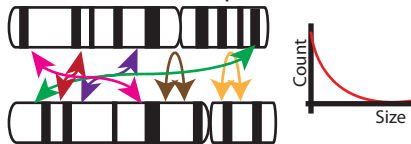

Simulate sequencing reads

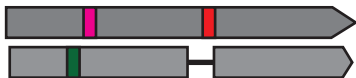

Add real reads to (&lt;1 purity)

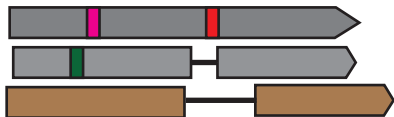**B**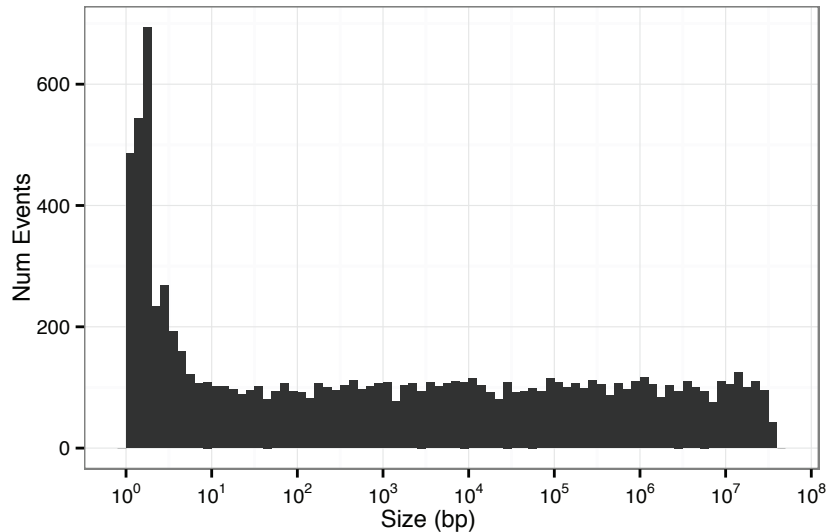

Supplement: Supplemental_Fig_S8.pdf [file Supplemental_Fig_S8.pdf]

**Supplemental Figure 9**

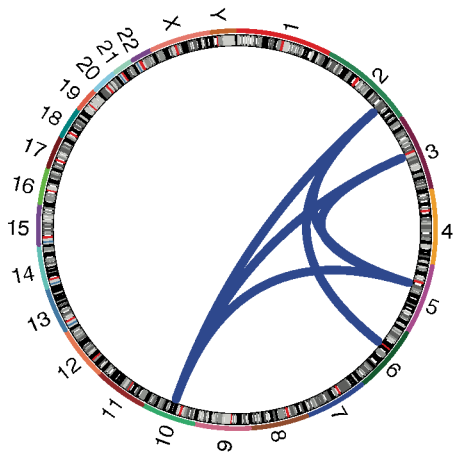

HCC1143 cluster 1

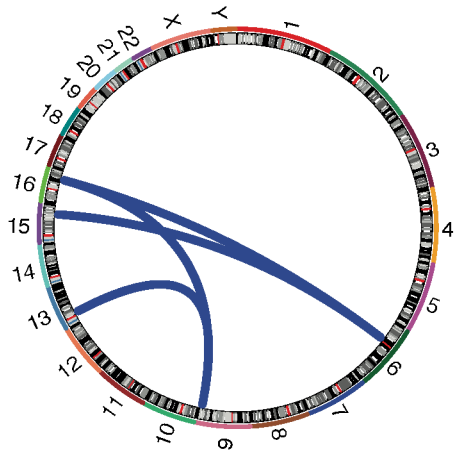

HCC1143 cluster 3

Supplement: Supplemental_Fig_S9.pdf [file Supplemental_Fig_S9.pdf]
